1 A pilot investigation of enteric pathogens and stunting and  
2 malnutrition using a combination of hospital surveillance and  
3 a birth cohort of children in Dili, Timor-Leste.

4  
5 Short title: Enteric pathogens and malnutrition in children from  
6 Timor-Leste.

7  
8 Danielle M. Cribb<sup>1\*</sup>, Nevio Sarmiento<sup>2,3</sup>, Almerio Moniz<sup>1</sup>, Nicholas S. S. Fancourt<sup>2</sup>, Kathryn Glass<sup>1</sup>,  
9 Anthony D. K. Draper<sup>1,2,4</sup>, Joshua R. Francis<sup>2</sup>, Milena M. Lay dos Santos<sup>3</sup>, Endang Soares da Silva<sup>3</sup>,  
10 Benjamin G. Polkinghorne<sup>1</sup>, Virginia de Lourdes da Conceição<sup>2,3</sup>, Feliciano da Conceição<sup>5</sup>, Paulino da  
11 Silva<sup>2</sup>, Joanita Jong<sup>5</sup>, Martyn D. Kirk<sup>1</sup>, Samantha Colquhoun<sup>1</sup>.

12

- 13 1. National Centre for Epidemiology and Population Health, Australian National University,  
14 Canberra, Australia  
15 2. Global and Tropical Health Division, Menzies School of Health Research, Charles Darwin  
16 University, Darwin, Australia  
17 3. Timor-Leste Ministry of Health, Dili, Timor-Leste  
18 4. Northern Territory Centre for Disease Control, Northern Territory Government Department  
19 of Health, Darwin, Australia  
20 5. Ministry of Agriculture and Fisheries, Dili, Timor-Leste

21

22 \* Corresponding author

23 Email: [Danielle.Cribb@anu.edu.au](mailto:Danielle.Cribb@anu.edu.au) (DC)

24

25

## 26 ABSTRACT

### 27 Background

28 Enteric pathogens contribute to child malnutrition in low-to-middle-income countries. In Timor-Leste,  
29 there has been limited study of this relationship.

### 30 Methodology/Principal findings

31 We investigated enteric disease, stunting, and malnutrition in children in Dili, Timor-Leste (July 2019  
32 – October 2020). Sixty infants received up to four home visits. We collected faecal samples,  
33 demographics, anthropometrics, food and water sources, feeding practices, and animal husbandry  
34 details. For 160 children admitted to Hospital Nacional Guido Valadares with clinical diagnosis of  
35 severe diarrhoea or severe acute malnutrition (SAM), we collected faecal samples, diagnostics, and  
36 anthropometrics. Faeces were tested by polymerase chain reaction (PCR) using the BioFire®  
37 FilmArray® Gastrointestinal Panel. Descriptive analyses and regression analyses were conducted using  
38 R.

39 We detected enteric pathogens in 68.8% (95% confidence interval [CI] 60.4–76.2%) of infants, 88.6%  
40 of children with SAM (95% CI 81.7–93.3%), and 93.8% of children with severe diarrhoea (95% CI 67.7–  
41 99.7%). Diarrhoeagenic *Escherichia coli* and *Campylobacter* spp. were most frequently detected. A  
42 median weight-for-height Z-score (WHZ) of -1.1 (interquartile range [IQR] -2.0 to -0.1) for infants  
43 across all home visits, -3.9 (IQR -4.7 to -3.0) for children with SAM and -2.6 (IQR -4.2 to -1.1) for children  
44 with severe diarrhoea was observed.

45 The most common admission diagnosis was SAM (88.1%, 95% CI 81.7–92.5%). Hospitalised children  
46 had increased odds of *Shigella*/enteroinvasive *E. coli* (OR 11.4, 95% CI 2.8–47.3) and *Giardia lamblia*  
47 detection (OR 31.7, 95% CI 3.6–280) compared with infants. For home visits, bottle feeding was  
48 associated with increased odds of pathogen detection (OR 8.2, 95% CI 1.1–59.7).

## 49 **Conclusions/Significance**

50 We detected high prevalence of enteric pathogens and signs of malnutrition in children in Dili. Our  
51 pilot is proof of concept for a study to fully explore the risk factors and associations between enteric  
52 pathogens and malnutrition in Timor-Leste.

53 Keywords: enteric pathogens, Timor-Leste, children, malnutrition, stunting, *Campylobacter*

54

## 55 **Author summary**

56 Enteric pathogens are a contributing factor to child malnutrition in low-to-middle-income countries.  
57 This study investigated the relationship between enteric disease, malnutrition, and stunting in  
58 children in Dili, Timor-Leste. Sixty infants received up to four home visits and 160 children were  
59 admitted to the hospital with a clinical diagnosis of severe diarrhoea or severe acute malnutrition.  
60 Faecal samples were collected and tested for enteric pathogens and risk factors were explored. The  
61 study found that enteric pathogens were detected in most infants and children with malnutrition and  
62 diarrhea. The most commonly detected pathogens were diarrheagenic *Escherichia coli* and  
63 *Campylobacter* spp. Most children exhibited signs of malnutrition from infancy, and hospitalised  
64 children had a higher likelihood of having certain enteric pathogens. Feeding practices, water use, and  
65 animal cohabitation may pose risks for enteric pathogen infection. The results suggest that enteric  
66 pathogens are a significant problem in Dili, Timor-Leste, and further research is needed to explore the  
67 complexity of risk factors.

## 68 Introduction

69 Childhood undernutrition is a major challenge for many countries and is associated with high levels of  
70 morbidity and mortality (1). In 2020, 22.0% of children aged under five years worldwide suffered from  
71 stunting (low height for age) and 6.7% suffered from wasting (low weight for height) (2). Children in  
72 low- and middle-income countries (LMICs) are disproportionately impacted by stunting (38.8%) and  
73 wasting (12.9%) (3). Undernutrition can lead to cognitive, physical, and metabolic developmental  
74 issues, potentially reducing physical and intellectual ability and economic productivity in adulthood  
75 (1).

76 Socioeconomic and environmental factors contribute to child undernutrition, including poor maternal  
77 health and education, early termination of breastfeeding, low household wealth, and unimproved  
78 sanitation (3, 4). There is growing evidence for an association between infection with enteric bacteria,  
79 viruses, and parasites and child stunting and wasting, particularly in LMICs (5, 6). Enteric bacterial  
80 pathogens contracted early in life may damage the lining of the small and large intestines, reducing  
81 the absorption of nutrients from food and promoting chronic inflammation, leading to undernutrition  
82 and a compromised immune system (5, 6). Such enteric pathogens potentially involved in stunting and  
83 malnutrition include enterotoxigenic *Escherichia coli* (ETEC), *Shigella*, and *Campylobacter* species (7-  
84 9).

85 *Campylobacter* is the most common cause of foodborne bacterial gastroenteritis globally, causing an  
86 estimated 96 million cases and >21,000 deaths annually (10). In high-income settings, infections are  
87 often sporadic in nature and largely attributed to consuming undercooked chicken (11). In low-income  
88 settings, *Campylobacter* is frequently endemic and while still largely attributed to poultry, infection  
89 determinants are from more varied environmental and zoonotic sources (11, 12). Recent studies have  
90 further implicated *Campylobacter* in child stunting and malnutrition. A Peruvian cohort exhibited poor  
91 weight gain with infection and marginal poor linear growth with symptomatic infection (7, 9).  
92 Similarly, 84.9% of the multisite Malnutrition and Enteric Disease Study (MAL-ED) cohort presented

93 with a *Campylobacter*-positive faecal sample by one year of age, with those diagnosed with multiple  
94 *Campylobacter* infections being more likely to exhibit poor linear growth (12).

95 Timor-Leste is one of the lowest-income countries in Asia and has a population of 1.34 million circa  
96 2022 (13, 14). The 2016 Demographic and Health Survey (DHS) estimated that the proportion of  
97 children with stunting was 46.5%, wasting 24.2% and underweight (low weight for age) 40.4% (15).  
98 Diarrhoeal disease is prevalent in Timor-Leste with 10.7% of children represented in the DHS  
99 presenting with diarrhoea within the two weeks preceding the survey, peaking at 17.8% in children  
100 aged 12-23 months (16).

101 We conducted a pilot investigation to examine the feasibility of a birth cohort and hospital-based  
102 surveillance study in Timor-Leste. We aimed to i) estimate the proportion of children from either a  
103 birth cohort or hospital admissions with severe acute malnutrition (SAM) and/or severe diarrhoea  
104 who tested positive for enteric pathogens on stool, ii) estimate the proportion of children from a birth  
105 cohort who were malnourished or stunted at any time during the first 12 months of life, iii) quantify  
106 malnourishment in children admitted to hospital with SAM and/or severe diarrhoea, iv) describe the  
107 social, environmental, food safety, and food security issues associated with enteric pathogen  
108 infections in Dili, Timor-Leste, and v) support capacity building in research and laboratory skills. This  
109 investigation formed the basis of a larger study to understand the impact of enteric pathogens on  
110 stunting and malnutrition.

111

## 112 **Methods**

113 This study was carried out at the national referral hospital in Dili, Timor-Leste, Hospital Nacional Guido  
114 Valadares (HNGV). HNGV has a catchment population of 500,000 people with approximately 4,500  
115 births per year.

## 116 **Birth cohort**

### 117 **Study setting and recruitment**

118 We recruited newborns into the longitudinal birth cohort between July and September 2019.  
119 Newborn infants were eligible for inclusion if they were born at  $\geq 38$  weeks gestation at HNGV and if  
120 they were reported to live within a 10-kilometre radius of HNGV. The local research team approached  
121 parents in the maternity unit at HNGV after delivery and prior to discharge. Parents provided informed  
122 consent to enrol their infants. Home visits occurred when infants were approximately one, four, seven,  
123 and 12 months of age.

### 124 **Equipment and questionnaire**

125 The local study team were trained to use a calibrated portable baby scale and a standardised mat for  
126 measuring weight (Seca 334 Baby Scales) and height (Seca 210 Mobile Measuring Mat for Babies and  
127 Toddlers). All infants were weighed and measured using a standardised procedure. In addition, the  
128 team interviewed parents using a standardised questionnaire at each visit to investigate feeding  
129 practices, household size, water, sanitation, and hygiene (WASH) practices and accessibility, and  
130 household animal ownership and containment (16). All data were collected on an android tablet using  
131 Research Electronic Data Capture (REDCap) (17, 18), synchronised online, and stored on a secure  
132 server hosted at the Australian National University (ANU).

### 133 **Specimen collection and testing**

134 Faecal samples were collected in sample pots from all infants at the time of the field visit or in the  
135 following days and transported to the lab in an insulated United Nations Children’s Fund container.  
136 Parents and/or guardians were provided with instructions in their native language, Tetum to ensure  
137 samples were correctly collected and stored prior to transport. Samples were transported to the  
138 National Health Laboratory (NHL) for polymerase chain reaction (PCR) testing and culture for  
139 *Campylobacter*, *Shigella* or *Salmonella* isolates. Animal faecal samples were collected from the  
140 environment proximal to homes where a positive *Campylobacter*, *Shigella* or *Salmonella* infant faecal  
141 sample was detected. Samples were transported to the Timor-Leste Diagnostics Laboratory for Animal  
142 Health (DLAH) for preparation and isolate culture on appropriate selective media.

## 143 **Hospital-based surveillance**

### 144 **Study setting and recruitment**

145 We recruited children admitted to HNGV with SAM, diarrhoea with severe dehydration (DWSD), or  
146 dysentery between October 2019 to July 2020 to investigate enteric pathogens in children with these  
147 conditions in Dili. Children were eligible for inclusion if they were aged less than five years at time of  
148 hospital admission, if they resided within Dili, and if they met the adapted World Health Organization  
149 (WHO) criteria for diagnosis of SAM, DWSD and/or severe dysentery (19).

### 150 **Specimen and information collection**

151 Participants were identified for eligibility by paediatricians during the daily paediatric ward round.  
152 Following informed consent from parents or guardians, ward nurses collected faecal samples from  
153 eligible children and the study team recorded vital statistics and demographic characteristics from the  
154 medical notes and transported the samples to the NHL for PCR testing.

### 155 **Pathogen detection**

156 The NHL used a BioFire® FilmArray® Gastrointestinal Panel PCR assay to test all faecal samples from  
157 birth cohort and hospitalised children to detect 22 enteric pathogens and parasites (20). Samples

158 positive by PCR for selected enteric bacteria (*Campylobacter*, *Salmonella* and *Shigella*/EIEC) were  
159 reflex cultured on appropriate selective media.

## 160 **Data analysis**

161 All data were cleaned and analysed using R statistical software (21). We converted anthropometric  
162 measures to weight-for-height (WHZ), height-for-age (HAZ), and weight-for-age (WAZ) Z scores and  
163 mapped these against the WHO child growth standards (22, 23) using R package “zscorer” (24). We  
164 performed Fisher’s exact and Chi-square tests to analyse differences between groups and visits. We  
165 calculated odds ratios (OR) using generalised estimating equations (GEE) to account for repeated  
166 observations with the R package “geepack”, where appropriate (25). GEE were used to analyse risk  
167 factors in the birth cohort against the outcomes of i) pathogen detection and ii) moderate wasting,  
168 defined as a WHZ of -2 or below (26). Additionally, GEE were used to analyse associations between  
169 hospitalised SAM cases and non-hospitalised children for pathogen detections, demographics and  
170 faecal consistency. GEE models used an exchangeable correlation structure and binomial distribution  
171 with logistic link. We used the “arsenal” package to calculate generalised linear models, where  
172 appropriate (27). A  $p$  value of  $p < 0.05$  was considered significant for Fisher’s and Chi-square tests, and  
173 an OR with confidence intervals (CI) that did not cross over one was considered significant for GEE.

## 174 **Ethics**

175 The Timor-Leste National Institute of Health-Research Ethics & Technical Committee (reference  
176 462/MS-INS/GDE/IV/2019) for the Timor-Leste Instituto Nacional de Saúde (INS), and the Australian  
177 National University Ethics Committee (reference 2019/221) provided ethical approval. The field study  
178 team were trained in Good Clinical Practice for research by the project lead (28). All parents or legal  
179 guardians provided informed consent prior to study enrolment.



## 180 Results

### 181 Birth cohort

182 We recruited 32 male and 28 female infants into the birth cohort. Only 53.3% (32/60) were retained  
183 until the final home visit. At birth, the median WHZ was 0.9 (interquartile range [IQR] -0.5 – 1.6), with  
184 no scores calculated for four newborns with lengths below 45cm (S1 Table). The median WHZ over all  
185 four home visits decreased to -1.1 (IQR -2.0 to -0.1). Of the 32 infants who were weighed and  
186 measured at all four visits, 31.3% (10/32) exhibited poor weight gain (WHZ of  $\leq -3.0$ ) on at least one  
187 visit. While the birth cohort tracked the WHO 50<sup>th</sup> percentile for height-for-age, weight-for-age and  
188 weight-for-height tracked between the 15<sup>th</sup> and 25<sup>th</sup> percentiles (**Error! Reference source not found.**).

189 **Fig 1. (a) Height-for-age World Health Organization standards compared with Timor-Leste birth cohort,**  
190 **2019–2020; (b) Weight-for-age WHO standards compared with Timor-Leste birth cohort, 2019–2020; (c)**  
191 **Weight-for-height WHO standards compared with Timor-Leste birth cohort, 2019–2020.** WHO percentiles are  
192 annotated on figure. 50<sup>th</sup> percentile for WHO standards is presented in bold. Grey shading represents the 95%  
193 confidence interval for the Timor-Leste birth cohort.

194 We collected 141 infant faecal specimens for PCR testing from 161 home visits (87.6% sample  
195 collection rate), with at least one faecal sample collected from 45/60 (75.0%) of participants. We  
196 detected at least one enteric pathogen in 68.8% (97/141; 95%CI 60.4%–76.2%) of samples, and of  
197 these 63.9% (62/97; 95% CI 53.5%–73.2%) were positive for multiple pathogens.

198 We observed significant differences in pathogen occurrence between home visits, with the number of  
199 pathogens detected within the cohort and the number of multiple pathogen detections in individual infants  
200 generally increasing with age ( $p < 0.05$ ;

201

202

203 **Table 1).** Twenty-two study participants had samples PCR tested at each visit, with each having at least  
204 one positive result for an enteric pathogen and 40.9% (9/22) positive at every visit. There was a weak  
205 relationship between WHZ and the number of pathogens detected per sample at each visit (**Fig 2**).

206

207

208

209 **Table 1: Number and proportion of pathogens detected by multiplex PCR at each birth cohort home visit and**  
210 **stool presentation of samples, Dili, Timor-Leste, 2019–2020.**

| Pathogen                                                                                                                                                                                                                                                                                                                       | Visit 1<br>n (%) | Visit 2<br>n (%) | Visit 3<br>n (%) | Visit 4<br>n (%) | Total<br>n (%)   |
|--------------------------------------------------------------------------------------------------------------------------------------------------------------------------------------------------------------------------------------------------------------------------------------------------------------------------------|------------------|------------------|------------------|------------------|------------------|
| <b>Bacteria</b>                                                                                                                                                                                                                                                                                                                |                  |                  |                  |                  |                  |
| <i>Campylobacter</i> spp.*                                                                                                                                                                                                                                                                                                     | 3 (6.7)          | 1 (2.9)          | 3 (8.3)          | 8 (30.8)         | <b>15 (10.6)</b> |
| <i>Clostridioides difficile</i>                                                                                                                                                                                                                                                                                                | 1 (2.2)          | 4 (11.8)         | 4 (11.1)         | 4 (15.4)         | <b>13 (9.2)</b>  |
| <i>Salmonella</i>                                                                                                                                                                                                                                                                                                              | 0 (0)            | 0 (0)            | 4 (11.1)         | 0 (0)            | <b>4 (2.8)</b>   |
| Shiga toxin-producing<br><i>Escherichia coli</i> (STEC)                                                                                                                                                                                                                                                                        | 0 (0)            | 0 (0)            | 0 (0)            | 2 (7.7)          | <b>2 (1.4)</b>   |
| Enteroaggregative <i>E. coli</i>                                                                                                                                                                                                                                                                                               | 11 (24.4)        | 21 (61.8)        | 30 (83.3)        | 15 (57.7)        | <b>77 (54.6)</b> |
| Enteropathogenic <i>E. coli</i>                                                                                                                                                                                                                                                                                                | 3 (6.7)          | 10 (29.4)        | 21 (58.3)        | 15 (57.7)        | <b>49 (34.8)</b> |
| Enterotoxigenic <i>E. coli</i> lt/st                                                                                                                                                                                                                                                                                           | 1 (2.2)          | 4 (11.8)         | 12 (33.3)        | 5 (19.2)         | <b>22 (15.6)</b> |
| <i>Shigella</i> /Enteroinvasive <i>E. coli</i>                                                                                                                                                                                                                                                                                 | 1 (2.2)          | 0 (0)            | 1 (2.8)          | 0 (0)            | <b>2 (1.4)</b>   |
| <i>Plesiomonas shigelloides</i>                                                                                                                                                                                                                                                                                                | 0 (0)            | 0 (0)            | 1 (2.8)          | 0 (0)            | <b>1 (0.7)</b>   |
| <i>Vibrio</i> spp. †                                                                                                                                                                                                                                                                                                           | 1 (2.2)          | 0 (0)            | 4 (11.1)         | 0 (0)            | <b>5 (3.5)</b>   |
| <b>Viruses</b>                                                                                                                                                                                                                                                                                                                 |                  |                  |                  |                  |                  |
| Adenovirus F40/41                                                                                                                                                                                                                                                                                                              | 0 (0)            | 0 (0)            | 2 (5.6)          | 4 (15.4)         | <b>6 (4.3)</b>   |
| Norovirus GI/GII                                                                                                                                                                                                                                                                                                               | 0 (0)            | 3 (8.8)          | 7 (19.4)         | 2 (7.7)          | <b>12 (8.5)</b>  |
| Rotavirus A                                                                                                                                                                                                                                                                                                                    | 0 (0)            | 3 (8.8)          | 2 (5.6)          | 4 (15.4)         | <b>9 (6.4)</b>   |
| Sapovirus                                                                                                                                                                                                                                                                                                                      | 0 (0)            | 0 (0)            | 4 (11.1)         | 0 (0)            | <b>4 (2.8)</b>   |
| <b>Parasites</b>                                                                                                                                                                                                                                                                                                               |                  |                  |                  |                  |                  |
| <i>Cryptosporidium</i> spp.                                                                                                                                                                                                                                                                                                    | 0 (0)            | 0 (0)            | 0 (0)            | 3 (11.5)         | <b>3 (2.1)</b>   |
| <i>Giardia lamblia</i>                                                                                                                                                                                                                                                                                                         | 0 (0)            | 0 (0)            | 1 (2.8)          | 0 (0)            | <b>1 (0.7)</b>   |
| <b>Total samples</b>                                                                                                                                                                                                                                                                                                           | <b>45</b>        | <b>34</b>        | <b>36</b>        | <b>26</b>        | <b>141</b>       |
| * <i>Campylobacter</i> spp. includes <i>C. jejuni</i> , <i>C. coli</i> , and <i>C. upsaliensis</i> . † <i>Vibrio</i> spp. includes <i>V. parahaemolyticus</i> , <i>V. vulnificus</i> , and <i>V. cholerae</i> .<br>N.B. percentages and counts do not equal total samples due to multiple pathogen detections in some samples. |                  |                  |                  |                  |                  |

211

212 **Fig 2. Weight-for-height Z-score by number of pathogens detected for each birth cohort visit, Dili, Timor-**  
213 **Leste, 2019–2020.**

214 Diarrhoeagenic *E. coli* (DEC) strains (Shiga toxin-producing *E. coli* [STEC], EPEC, EAEC, and ETEC) were  
215 the most common pathogens detected. Six infants were PCR positive for DEC at all four visits, with  
216 EAEC detected in 96.0% (23/24) of their faecal samples, indicating possible chronic carriage. Fifteen  
217 samples were PCR positive for *Campylobacter* spp., four samples of *Salmonella*, and two samples of  
218 *Shigella*/enteroinvasive *E. coli* (EIEC) across the entire cohort. During the first home visits, three  
219 samples collected from animal faeces were successfully cultured and *Campylobacter* spp. isolated by  
220 the DLAH team. No isolates were cultured from human clinical samples.

221 Full descriptive results and ORs for these analyses are available in S2 Table and S3 Table. Compared to  
222 children aged <3 months, we found that those aged 3–<6 months (OR 5.4, 95% CI 2.1–14.3), 6–<9  
223 months (OR 18.1, 95% CI 4.8–68.8), and ≥12-months (OR 12.1, 95% CI 3.1–47.0) had higher odds of  
224 pathogen detection, i.e., the odds of pathogen detection increased with age. We controlled for age in  
225 analysis of all additional risk factors. We found that exclusive bottle feeding was associated with  
226 increased odds of enteric pathogen detection (OR 8.2, 95% CI 1.1–59.7) compared with breastfeeding.  
227 No other factors were found to be statistically significant.

228 For the outcome of wasting, controlled for age, we found that households with five or fewer members  
229 were associated with lower odds of wasting (OR 0.2, 95% CI 0.1–1.0) compared to those with 6–10  
230 household members. No other factors were significant.

## 231 **Hospital-based surveillance**

232 We recruited 160 children in hospital-based surveillance. One child was excluded as they were aged  
233 above five years. We included 159 children in descriptive analyses including those that were missing  
234 anthropometric data including gender (n=2), middle-upper arm circumference (n=5), and height (n=1).  
235 Females represented 52.9% (83/157) of participants with known gender. We received PCR results  
236 from 148 participants as two patients were discharged before specimen collection and nine were  
237 missing laboratory PCR data.

238 The mean age at admission was 17.7 months (range 1.0–55.7 months, standard deviation (SD) ±11.4).  
239 We diagnosed 140 (88.1%, 95% CI 81.7–92.5%) children with SAM and 19 (11.9%, 95% CI 7.5–18.3%)  
240 with severe diarrhoeal disease (13 with DWSD, and six with dysentery). The median WHZ for those  
241 diagnosed with SAM (-3.9, IQR -4.7 to -3.0) was lower than those with severe diarrhoea (-2.6, IQR -4.2  
242 to -1.1). Six WHZ were not calculated for SAM participants due to unknown gender (n=2), unknown  
243 height (n=1) or a height below 45cm (n=3).

244 Of the 148 participants with complete multiplex PCR results, 88.6% (117/132; 95% CI 81.7–93.3%) of  
245 SAM participants were positive for at least one enteric pathogen, with 73.5% (97/132; 95% CI 65.0–  
246 80.6%) positive for multiple pathogens. Of those diagnosed with severe diarrhoea, 93.8% (15/16; 95%  
247 CI 67.7–99.7%) were positive for at least one enteric pathogen and all but one were positive for  
248 multiple pathogens (14/16; 87.5%, 95% CI 60.4–97.8%). We detected EAEC and/or EPEC in 81.8%  
249 (9/11) of loose faecal samples. The age at admission for participants varied between the type of  
250 pathogen detected, with viral pathogens detected in admissions with a mean age of 13.8 months ( $SD$   
251  $\pm 8.1$ ), bacteria at 17.8 months ( $SD \pm 11.2$ ), and parasites at 19.3 months ( $SD \pm 11.7$ ). There were no  
252 statistically significant differences for age at admission by pathogen group between SAM and severe  
253 diarrhoea cases ( $p > 0.05$ ) (S4 Table).

254 The mean number of pathogens detected per individual was 2.8 (range 0–7). The most detected  
255 pathogens were DEC species followed by *Campylobacter* spp., *Shigella*/EIEC, and *Giardia lamblia* (

256 Table 2). Two *Campylobacter* spp. and two *Salmonella* isolates were cultured.

257

258 **Table 2: Hospital-based surveillance data of diagnosis-specific pathogen detections and total pathogen**  
 259 **detections from PCR testing, Dili, Timor-Leste, 2019-2020.**

| Pathogen                                                                                                                                                                                                                                                                                                                                                                                                                                                                                 | Pathogen detections in SAM cases<br>n (%) | Pathogen detections in severe diarrhoea <sup>‡</sup><br>cases<br>n (%) | All pathogen detections<br>n (%) |
|------------------------------------------------------------------------------------------------------------------------------------------------------------------------------------------------------------------------------------------------------------------------------------------------------------------------------------------------------------------------------------------------------------------------------------------------------------------------------------------|-------------------------------------------|------------------------------------------------------------------------|----------------------------------|
| <b>Bacteria</b>                                                                                                                                                                                                                                                                                                                                                                                                                                                                          |                                           |                                                                        |                                  |
| <i>Campylobacter</i> spp.*                                                                                                                                                                                                                                                                                                                                                                                                                                                               | 33 (25.0)                                 | 3 (18.8)                                                               | 36 (24.3)                        |
| <i>Clostridioides difficile</i>                                                                                                                                                                                                                                                                                                                                                                                                                                                          | 6 (4.5)                                   | 0 (0.0)                                                                | 6 (4.1)                          |
| <i>Plesiomonas shigelloides</i>                                                                                                                                                                                                                                                                                                                                                                                                                                                          | 1 (0.8)                                   | 0 (0.0)                                                                | 1 (0.7)                          |
| <i>Salmonella</i>                                                                                                                                                                                                                                                                                                                                                                                                                                                                        | 4 (3.0)                                   | 1 (6.3)                                                                | 5 (3.4)                          |
| Shiga toxin-producing <i>Escherichia coli</i> (STEC)                                                                                                                                                                                                                                                                                                                                                                                                                                     | 4 (3.0)                                   | 0 (0.0)                                                                | 4 (2.7)                          |
| Enteroaggregative <i>E. coli</i>                                                                                                                                                                                                                                                                                                                                                                                                                                                         | 84 (63.6)                                 | 10 (62.5)                                                              | 94 (63.5)                        |
| Enteropathogenic <i>E. coli</i>                                                                                                                                                                                                                                                                                                                                                                                                                                                          | 70 (53.0)                                 | 10 (62.5)                                                              | 80 (54.1)                        |
| Enterotoxigenic <i>E. coli</i> lt/st                                                                                                                                                                                                                                                                                                                                                                                                                                                     | 41 (31.1)                                 | 4 (25.0)                                                               | 45 (30.4)                        |
| <i>E. coli</i> O157                                                                                                                                                                                                                                                                                                                                                                                                                                                                      | 2 (1.5)                                   | 0 (0.0)                                                                | 2 (1.4)                          |
| <i>Shigella</i> /Enteroinvasive <i>E. coli</i>                                                                                                                                                                                                                                                                                                                                                                                                                                           | 23 (17.4)                                 | 7 (43.8)                                                               | 30 (20.3)                        |
| <i>Vibrio</i> spp. <sup>†</sup>                                                                                                                                                                                                                                                                                                                                                                                                                                                          | 5 (3.8)                                   | 3 (18.8)                                                               | 8 (5.4)                          |
| <b>Viruses</b>                                                                                                                                                                                                                                                                                                                                                                                                                                                                           |                                           |                                                                        |                                  |
| Adenovirus F40/41                                                                                                                                                                                                                                                                                                                                                                                                                                                                        | 3 (2.3)                                   | 1 (6.3)                                                                | 4 (2.7)                          |
| Astrovirus                                                                                                                                                                                                                                                                                                                                                                                                                                                                               | 6 (4.5)                                   | 1 (6.3)                                                                | 7 (4.7)                          |
| Norovirus GI/GII                                                                                                                                                                                                                                                                                                                                                                                                                                                                         | 12 (9.1)                                  | 1 (6.3)                                                                | 13 (8.8)                         |
| Rotavirus A                                                                                                                                                                                                                                                                                                                                                                                                                                                                              | 6 (4.5)                                   | 1 (6.3)                                                                | 7 (4.7)                          |
| Sapovirus                                                                                                                                                                                                                                                                                                                                                                                                                                                                                | 13 (9.8)                                  | 1 (6.3)                                                                | 14 (9.5)                         |
| <b>Parasites</b>                                                                                                                                                                                                                                                                                                                                                                                                                                                                         |                                           |                                                                        |                                  |
| <i>Cryptosporidium</i> spp.                                                                                                                                                                                                                                                                                                                                                                                                                                                              | 17 (12.9)                                 | 1 (6.3)                                                                | 18 (12.2)                        |
| <i>Giardia lamblia</i>                                                                                                                                                                                                                                                                                                                                                                                                                                                                   | 31 (23.5)                                 | 2 (12.5)                                                               | 33 (22.3)                        |
| <i>Cyclospora cayetanensis</i>                                                                                                                                                                                                                                                                                                                                                                                                                                                           | 12 (9.1)                                  | 0 (0.0)                                                                | 12 (8.1)                         |
| <i>Entamoeba histolytica</i>                                                                                                                                                                                                                                                                                                                                                                                                                                                             | 0 (0.0)                                   | 1 (6.3)                                                                | 1 (0.7)                          |
| <b>Total samples</b>                                                                                                                                                                                                                                                                                                                                                                                                                                                                     | <b>132</b>                                | <b>16</b>                                                              | <b>148</b>                       |
| * <i>Campylobacter</i> spp. includes <i>C. jejuni</i> , <i>C. coli</i> , and <i>C. upsaliensis</i> . † <i>Vibrio</i> spp. includes <i>V. parahaemolyticus</i> , <i>V. vulnificus</i> , and <i>V. cholerae</i> . ‡Severe diarrhoea includes diarrhoea with severe dehydration and dysentery diagnoses. PCR = polymerase chain reaction test. SAM = severe acute malnutrition. N.B. percentages and counts do not equal total samples due to multiple pathogen detections in some samples. |                                           |                                                                        |                                  |

260

## 261 Comparing hospitalised and non-hospitalised children

262 Hospitalised children had increased odds of both *Shigella*/EIEC (OR 11.4, 95% CI 2.8–47.3) and *Giardia*  
 263 *lamblia* infection (OR 31.7, 95% CI 3.6–280) compared with the non-hospitalised birth cohort (S5  
 264 Table).

## 265 Discussion

266 Infants and young children from a birth cohort and hospital-based surveillance study exhibited high  
267 enteric pathogen loads and signs of wasting and undernutrition from the first months of life. Ninety  
268 percent of children admitted to hospital for treatment of DWSD, dysentery, or SAM were positive for  
269 at least one enteric pathogen and 70% of infants visited at home also returned a positive PCR test for  
270 at least one enteric pathogen over the 12-month study. A high proportion of samples across both  
271 study arms had multiple pathogens recovered. Pathogen detection generally increased with age  
272 within the birth cohort, likely influenced by exposure to new nutrition sources and environmental  
273 factors. While the mechanisms of child malnutrition remain complex, our pilot study has  
274 demonstrated the ability to conduct longitudinal research in Timor-Leste to explore and understand  
275 the relationship between enteric pathogens and malnutrition.

276 We detected a variety of enteric pathogens in children regardless of the presence of wasting and  
277 diarrhoeal disease. Across symptomatic and asymptomatic faecal samples, *Campylobacter* spp., DEC  
278 strains EAEC, EPEC, and ETEC, *Shigella*/EIEC, norovirus, *Giardia*, and *Cryptosporidium* were most  
279 prevalent. This is consistent with results from the MAL-ED study (29) and the Global Enteric  
280 Multicenter Study (GEMS)(30). Diarrhoeal faecal samples in our study frequently had DEC strains  
281 present, suggesting these may be driving disease presentation in combination with non-pathogenic  
282 factors. Pathogenic *E. coli* is commonly identified as a cause of both acute and persistent paediatric  
283 diarrhoea in low- and middle-income countries (31-34), particularly in malnourished children (35, 36).  
284 Further, GEMS found that diarrhoea from typical EPEC and heat stable ETEC infections were associated  
285 with malnutrition and an increased risk of death in infants (34). There is evidence of chronic carriage  
286 or reinfection with EAEC in the birth cohort. While persistent EAEC infections are known to be  
287 implicated in long-term diarrhoeal disease in children, this was not evident in our study (37-39).  
288 Children diagnosed with DWSD or dysentery in hospital-based surveillance had a high prevalence of  
289 DEC, *Campylobacter* spp. and/or *Shigella*, pathogens previously implicated with these conditions (40).

290 Despite high prevalence of certain pathogens, we did not detect any significant relationships between  
291 individual pathogens and wasting or diarrhoeal disease presentation. This may indicate that these  
292 outcomes are due to multiple pathogen interactions or additional nutritional or environmental  
293 factors. Pathogen virulence likely also plays an important part in the distribution of pathogens  
294 between malnourished and/or diarrhoeal children versus those that are relatively healthy (41).

295 Most pathogens were recovered from faecal samples with limited or no evidence of diarrhoeal  
296 disease. While diarrhoeal disease is implicated in child malnutrition, subclinical infections with enteric  
297 pathogens may be more strongly linked to poor growth outcomes (12). The MAL-ED study detected  
298 high prevalence of *Campylobacter* from an early age and a negative association between high  
299 pathogen load and growth, particularly in asymptomatic cases (12). Carriage of enteric pathogens like  
300 EAEC and *Campylobacter* can lead to enteric and systemic inflammation and malabsorption of  
301 nutrients resulting in malnutrition and faltered growth, particularly in prolonged cases or repeat  
302 infections (42-44). Detection of a wide range of pathogens in the absence of diarrhoeal symptoms  
303 warrants further investigation to understand the relationship between enteric pathogens and  
304 malnutrition (29).

305 Within Timor-Leste and neighbouring Southeast Asian countries, there is limited evidence on the  
306 prevalence of enteric pathogens both in clinical and environmental settings. A multisite study of  
307 children aged under five years conducted in Indonesia between 2009 and 2012 detected a high  
308 prevalence of rotavirus (37.4%), adenovirus (34.9%) and ETEC (10.0%) (45). Another Indonesian case-  
309 control study of diarrhoeal disease conducted between 1997 and 1999 detected very low levels of  
310 enteric pathogens in paediatric patients using culture-based methods (i.e., less than 8.0% prevalence  
311 for total pathogens)(46), however, it is worth noting that culture-based methods can be lower in  
312 sensitivity than PCR-based methods. Our present study aimed to explore environmental and zoonotic  
313 pathogen sources in addition to risk factors in the home. Flooding is common in the region, particularly  
314 Timor-Leste. This combined with ubiquitous pit latrines and improper garbage disposal provides ample



315 opportunities for transmission of enteric pathogens in the environment. This is supported by a  
316 Nigerian study that tested groundwater sources for enteric pathogens. High levels of bacteria  
317 including *E. coli*, *Salmonella*, *Shigella*, and *Campylobacter* spp. were found in boreholes that likely  
318 weren't adequately maintained and had contamination from nearby septic tanks, sludge systems, and  
319 waste dumpsites (47). An Egyptian study also isolated these bacteria from ground water in rural areas  
320 (48). While efforts to improve personal practice with water, sanitation, and hygiene measures, food  
321 sources and preparation, and animal husbandry are important, exploring the endemicity of enteric  
322 pathogens in the environment should also be explored.

323 There are several limitations of our study. This study was conducted to examine acceptability for  
324 undertaking a larger birth cohort study. It was under-powered to examine some important  
325 relationships. Timor-Leste is prone to flash-flooding making it difficult to undertake home visits and,  
326 on a few occasions, HNGV and NHL experienced flash-flooding. We had reasonably high attrition of  
327 our birth cohort, due to highly mobile families especially during the COVID-19 pandemic when the  
328 study was interrupted between April and July 2020, leading to substantial loss to follow up. Limited  
329 animal faecal samples were able to be collected due an outbreak in African Swine fever in the first six  
330 months of the study. In addition, multiplex PCR testing is very sensitive and detects presence of  
331 pathogen nucleic acid but not necessarily viable pathogen. The Biofire GI PCR panel has shown high  
332 sensitivity and specificity in detection of diarrhoeal pathogens (49). We intended to culture all human  
333 clinical *Salmonella*, *Campylobacter* and *Shigella* samples at NHL, however due to a lack of available  
334 resources this was not completed in most cases. In the absence of culture results to compare to the  
335 positive PCR results for *Campylobacter*, *Shigella* and *Salmonella* we were unable to determine the  
336 validity of the PCR results in this setting. However, similar studies have shown that multiplex PCR  
337 testing can provide an accurate description of enteric pathogen prevalence in low- and middle-income  
338 countries (50, 51).

339 In this study, we demonstrated the possibility of undertaking longitudinal field research in Timor-Leste  
340 and produced useful and practical information that will be used to assist in guiding the strategy and  
341 approach of future research. Nutrition awareness, choices and availability, food and water safety and  
342 exposure to animal and environmental pathogens affect lives of Timor-Leste families and contribute  
343 to the multiple malnutrition risk factors. We recommend conducting a larger-scale study to investigate  
344 infant and child dietary practices, food safety, WASH, gender, cultural and environmental hygiene  
345 conditions in relation to One Health and food safety and security, with a focus on the risk of enteric  
346 pathogens. This project should comprehensively investigate malnutrition and stunting risk factors,  
347 including zoonotic transmission of enteric pathogens to provide an evidence base for targeted  
348 interventions in urban and rural settings in Timor-Leste, utilising a One Health collaborative approach  
349 to enhance collaboration and capacity.

## 350 **Acknowledgements**

351 The authors thank all persons and organisations that provided support for this study. These include:  
352 Professor Néilson Martins and the National Institute of Health-Research Ethics & Technical Committee;  
353 Dr Dongbao Yu and Dr Rajesh Pandav at the World Health Organization; Dr Merita Monteiro at  
354 Departamentu Kontrolu Moras Hada'et (CDC); Maria Angela Varela Niha at Departamentu Vijilansia  
355 Epidemiolojia, Ministério da Saúde; Dr Jeremy Beckett at Maluk Timor; local research team members  
356 Francisca Soares and Antoninho Gusmão; Menzies staff including Dr Jennifer Yan, Salvador Amaral, Dr  
357 Ian Marr, Lucsendar Alves, Dr Jo Wapling, Karen Champlin, and Dr Shawn Ting; Ismael Barreto and all  
358 staff from the National Health Laboratory; all staff from the Diagnostics Laboratory for Animal Health;  
359 all staff at HNGV including Dr Flavio Brandão de Araujo, Dr Ingrid Bucens, Dr Amelia Ferreria Pinto and  
360 the HNGV Paediatrics team; Ms Melanie McVean and the St John of God Midwifery team; the HNGV  
361 Obstetrics and Midwifery team, and; Dr Anna Okello, Dr Francette Geraghty-Dusan, and Bethany Lees  
362 from the Australian Centre for International Agricultural Research.

363

## 364 References

- 365 1. Kinyoki DK, Osgood-Zimmerman AE, Pickering BV, Schaeffer LE, Marczak LB, Lazzar-Atwood A,  
366 et al. Mapping child growth failure across low- and middle-income countries. *Nature*.  
367 2020;577(7789):231-4. doi: 10.1038/s41586-019-1878-8
- 368 2. United Nations. The Sustainable Development Goals Report 2022. 2022.
- 369 3. Li Z, Kim R, Vollmer S, Subramanian SV. Factors Associated With Child Stunting, Wasting, and  
370 Underweight in 35 Low- and Middle-Income Countries. *JAMA Netw Open*. 2020;3(4):e203386. doi:  
371 10.1001/jamanetworkopen.2020.3386
- 372 4. Mizumoto K, Takahashi T, Kinoshita Y, Higuchi M, Bachroen C, Da Silva V. A qualitative study  
373 of risk factors related to child malnutrition in Aileu District, Timor-Leste. *Asia Pac J Public Health*.  
374 2015;27(2):NP1398-408. doi: 10.1177/1010539513486175
- 375 5. MAL-ED Network Investigators. The MAL-ED Study: A Multinational and Multidisciplinary  
376 Approach to Understand the Relationship Between Enteric Pathogens, Malnutrition, Gut Physiology,  
377 Physical Growth, Cognitive Development, and Immune Responses in Infants and Children Up to 2 Years  
378 of Age in Resource-Poor Environments. *Clin Infect Dis*. 2014;59(suppl\_4):S193-S206. doi:  
379 10.1093/cid/ciu653
- 380 6. Petri WA, Jr., Miller M, Binder HJ, Levine MM, Dillingham R, Guerrant RL. Enteric infections,  
381 diarrhea, and their impact on function and development. *J Clin Invest*. 2008;118(4):1277-90. doi:  
382 10.1172/JCI34005
- 383 7. Lee G, Olortegui MP, Yori PP, Black RE, Caulfield L, Chavez CB, et al. Effects of *Shigella*-,  
384 *Campylobacter*-and ETEC-associated diarrhea on childhood growth. *Pediatr Infect Dis J*.  
385 2014;33(10):1004-9. doi: 10.1097/INF.0000000000000351
- 386 8. Black RE, Brown KH, Becker S. Effects of diarrhea associated with specific enteropathogens on  
387 the growth of children in rural Bangladesh. *Pediatrics*. 1984;73(6):799-805. doi:
- 388 9. Lee G, Pan W, Peñataro Yori P, Paredes Olortegui M, Tilley D, Gregory M, et al. Symptomatic  
389 and Asymptomatic *Campylobacter* Infections Associated with Reduced Growth in Peruvian Children.  
390 *PLoS Negl Trop Dis*. 2013;7(1):e2036. doi: 10.1371/journal.pntd.0002036
- 391 10. World Health Organization. WHO estimates of the global burden of foodborne diseases:  
392 foodborne disease burden epidemiology reference group 2007-2015. Geneva, Switzerland; 2015.
- 393 11. Kaakoush NO, Castaño-Rodríguez N, Mitchell HM, Man SM. Global Epidemiology of  
394 *Campylobacter* Infection. *Clin Microbiol Rev*. 2015;28(3):687-720. doi: 10.1128/CMR.00006-15

- 395 12. Amour C, Gratz J, Mduma E, Svensen E, Rogawski ET, McGrath M, et al. Epidemiology and  
396 Impact of *Campylobacter* Infection in Children in 8 Low-Resource Settings: Results From the MAL-ED  
397 Study. Clin Infect Dis. 2016;63(9):1171-9. doi: 10.1093/cid/ciw542
- 398 13. Provo A, Atwood S, Sullivan EB, Mbuya N. Malnutrition in Timor-Leste: A review of the burden,  
399 drivers, and potential response World Bank; 2017.
- 400 14. UNFPA Timor-Leste. Timor-Leste Population and Housing Census 2022: Preliminary Results.  
401 Government of Timor-Leste; 2022.
- 402 15. Hall A, Hyder Z, Karyadi E. Malnutrition in young children and their mothers in Timor-Leste.  
403 Washington, D.C; 2020.
- 404 16. General Directorate of Statistics. Timor-Leste Demographic and Health Survey 2016. Dili,  
405 Timor-Leste: GDS and ICF; 2018.
- 406 17. Harris PA, Taylor R, Thielke R, Payne J, Gonzalez N, Conde JG. Research electronic data capture  
407 (REDCap)—A metadata-driven methodology and workflow process for providing translational  
408 research informatics support. J Biomed Inform. 2009;42(2):377-81. doi: 10.1016/j.jbi.2008.08.010
- 409 18. Harris PA, Taylor R, Minor BL, Elliott V, Fernandez M, O'Neal L, et al. The REDCap consortium:  
410 Building an international community of software platform partners. J Biomed Inform.  
411 2019;95:103208. doi: 10.1016/j.jbi.2019.103208
- 412 19. World Health Organization. Management of severe malnutrition: a manual for physicians and  
413 other senior health workers. Geneva; 1999.
- 414 20. Biomérieux. The BioFire® FilmArray® Gastrointestinal (GI) Panel 2022 [cited 2022 1  
415 September]. Available from: <https://www.biofire.com/products/the-filmarray-panels/filmarraygi/>.
- 416 21. R Core Team. R: A language and environment for statistical computing Vienna, Austria 2022  
417 [cited 2022 1 September]. Available from: <https://www.R-project.org/>.
- 418 22. World Health Organization. WHO child growth standards : length/height-for-age, weight-for-  
419 age, weight-for-length, weight -for-height and body mass index-for-age : methods and development.  
420 2006 [cited 2022 1 July]. Available from: <https://www.who.int/publications/i/item/924154693X>.
- 421 23. World Health Organization. WHO child growth standards : head circumference-for-age, arm  
422 circumference-for-age, triceps skinfold-for-age and subscapular skinfold-for-age : methods and  
423 development. 2007 [cited 2022 1 July]. Available from:  
424 <https://www.who.int/publications/i/item/9789241547185>.
- 425 24. Myatt MaG, E. zscorer: Child Anthropometry z-Score Calculator 2019 [cited 2022 1  
426 September]. Available from: <https://CRAN.R-project.org/package=zscorer>.
- 427 25. Højsgaard S, Halekoh U, Yan J. The R Package geepack for Generalized Estimating Equations. J  
428 Stat Soft. 2005;15(2):1-11. doi: 10.18637/jss.v015.i02

- 429 26. Croft T, Marshall, A, Allen, C et al. Guide to DHS Statistics: DHS-7 (version 2): The Demographic  
430 and Health Surveys Program. Rockville, Maryland, USA: ICF; 2020.
- 431 27. Heinzen E, Sinnwell, J, Atkinson, E, Gunderson, T, Dougherty, G, Votruba, P, Lennon, R,  
432 Hanson, A, Goergen, K, Lundt, E, Broderick, B, McCullough, M. arsenal: An Arsenal of 'R' Functions for  
433 Large-Scale Statistical Summaries 2021 [cited 2022 1 September]. Available from: [https://CRAN.R-](https://CRAN.R-project.org/package=arsenal)  
434 [project.org/package=arsenal](https://CRAN.R-project.org/package=arsenal).
- 435 28. Global Health Training Centre. Research Ethics Online Training 2022 [cited 2022 1 December].  
436 Available from: <https://globalhealthtrainingcentre.tghn.org/elearning/research-ethics/>.
- 437 29. Platts-Mills JA, Babji S, Bodhidatta L, Gratz J, Haque R, Havt A, et al. Pathogen-specific burdens  
438 of community diarrhoea in developing countries: a multisite birth cohort study (MAL-ED). *Lancet Glob*  
439 *Health*. 2015;3(9):e564-75. doi: 10.1016/s2214-109x(15)00151-5
- 440 30. Kotloff KL, Nasrin D, Blackwelder WC, Wu Y, Farag T, Panchalingham S, et al. The incidence,  
441 aetiology, and adverse clinical consequences of less severe diarrhoeal episodes among infants and  
442 children residing in low-income and middle-income countries: a 12-month case-control study as a  
443 follow-on to the Global Enteric Multicenter Study (GEMS). *Lancet Glob Health*. 2019;7(5):e568-e84.  
444 doi: 10.1016/S2214-109X(19)30076-2
- 445 31. Nataro JP, Kaper JB. Diarrheagenic *Escherichia coli*. *Clin Microbiol Rev*. 1998;11(1):142-201.  
446 doi: 10.1128/CMR.11.1.142
- 447 32. Ellis SJ, Crossman LC, McGrath CJ, Chattaway MA, Holken JM, Brett B, et al. Identification and  
448 characterisation of enteroaggregative *Escherichia coli* subtypes associated with human disease. *Sci*  
449 *Rep*. 2020;10(1):7475. doi: 10.1038/s41598-020-64424-3
- 450 33. Gomes TA, Elias WP, Scaletsky IC, Guth BE, Rodrigues JF, Piazza RM, et al. Diarrheagenic  
451 *Escherichia coli*. *Braz J Microbiol*. 2016;47(Suppl 1):3-30. doi: 10.1016/j.bjm.2016.10.015
- 452 34. Kotloff KL, Nataro JP, Blackwelder WC, Nasrin D, Farag TH, Panchalingam S, et al. Burden and  
453 aetiology of diarrhoeal disease in infants and young children in developing countries (the Global  
454 Enteric Multicenter Study, GEMS): a prospective, case-control study. *Lancet*. 2013;382(9888):209-22.  
455 doi: 10.1016/S0140-6736(13)60844-2
- 456 35. Berkley JA, Lowe BS, Mwangi I, Williams T, Bauni E, Mwarumba S, et al. Bacteremia among  
457 children admitted to a rural hospital in Kenya. *N Engl J Med*. 2005;352(1):39-47. doi:  
458 10.1056/NEJMoa040275
- 459 36. Chisti MJ, Tebruegge M, La Vincente S, Graham SM, Duke T. Pneumonia in severely  
460 malnourished children in developing countries - mortality risk, aetiology and validity of WHO clinical  
461 signs: a systematic review. *Trop Med Int Health*. 2009;14(10):1173-89. doi: 10.1111/j.1365-  
462 3156.2009.02364.x

- 463 37. Jensen BH, Olsen KEP, Struve C, Krogfelt KA, Petersen AM. Epidemiology and Clinical  
464 Manifestations of Enteroaggregative *Escherichia coli*. Clin Microbiol Rev. 2014;27(3):614-30. doi:  
465 10.1128/CMR.00112-13
- 466 38. Roche JK, Cabel A, Sevilleja J, Nataro J, Guerrant RL. Enteroaggregative *Escherichia coli* (EAEC)  
467 impairs growth while malnutrition worsens EAEC infection: a novel murine model of the infection  
468 malnutrition cycle. J Infect Dis. 2010;202(4):506-14. doi: 10.1086/654894
- 469 39. Huang DB, Mohanty A, DuPont HL, Okhuysen PC, Chiang T. A review of an emerging enteric  
470 pathogen: enteroaggregative *Escherichia coli*. J Med Microbiol. 2006;55(10):1303-11. doi:  
471 10.1099/jmm.0.46674-0
- 472 40. François R, Yori PP, Rouhani S, Sigvas Salas M, Paredes Olortegui M, Rengifo Trigoso D, et al.  
473 The other Campylobacters: Not innocent bystanders in endemic diarrhea and dysentery in children in  
474 low-income settings. PLoS Negl Trop Dis. 2018;12(2):e0006200. doi: 10.1371/journal.pntd.0006200
- 475 41. Tickell KD, Sharmin R, Deichsel EL, Lamberti LM, Walson JL, Faruque ASG, et al. The effect of  
476 acute malnutrition on enteric pathogens, moderate-to-severe diarrhoea, and associated mortality in  
477 the Global Enteric Multicenter Study cohort: a post-hoc analysis. Lancet Glob Health. 2020;8(2):e215-  
478 e24. doi: 10.1016/s2214-109x(19)30498-x
- 479 42. Okhuysen PC, Dupont HL. Enteroaggregative *Escherichia coli* (EAEC): a cause of acute and  
480 persistent diarrhea of worldwide importance. J Infect Dis. 2010;202(4):503-5. doi: 10.1086/654895
- 481 43. MAL-ED Network Investigators. Relationship between growth and illness, enteropathogens  
482 and dietary intakes in the first 2 years of life: findings from the MAL-ED birth cohort study. BMJ Glob  
483 Health. 2017;2(4):e000370. doi: 10.1136/bmjgh-2017-000370
- 484 44. Kosek MN, Ahmed T, Bhutta Z, Caulfield L, Guerrant R, Houghton E, et al. Causal Pathways from  
485 Enteropathogens to Environmental Enteropathy: Findings from the MAL-ED Birth Cohort Study.  
486 EBioMedicine. 2017;18:109-17. doi: 10.1016/j.ebiom.2017.02.024
- 487 45. Puspandari N, Amalia, N, Hartoyo, Y, Nursufiah, S, Sunarno, S, Sariadji, K. Enteric pathogen  
488 among children under five years old with diarrheal diseases in Indonesia. IOP Conf Ser Earth Environ  
489 Sci. 2021;913. doi: 10.1088/1755-1315/913/1/012098
- 490 46. Oyofe BA, Subekti D, Tjaniadi P, Machpud N, Komalarini S, Setiawan B, et al. Enteropathogens  
491 associated with acute diarrhea in community and hospital patients in Jakarta, Indonesia. FEMS  
492 Immunol Med Microbiol. 2002;34(2):139-46. doi: 10.1111/j.1574-695X.2002.tb00615.x
- 493 47. Olalemi AO, Ige OM, James GA, Obasoro FI, Okoko FO, Ogunleye CO. Detection of enteric  
494 bacteria in two groundwater sources and associated microbial health risks. J Water Health.  
495 2021;19(2):322-35. doi: 10.2166/wh.2021.212

- 496 48. Elfadaly HA, Hassanain NA, Hassanain MA, Barakat AM, Shaapan RM. Evaluation of primitive  
497 ground water supplies as a risk factor for the development of major waterborne zoonosis in Egyptian  
498 children living in rural areas. *J Infect Public Health*. 2018;11(2):203-8. doi: 10.1016/j.jiph.2017.07.025
- 499 49. Jo SJ, Kang HM, Kim JO, Cho H, Heo W, Yoo IY, et al. Evaluation of the BioFire Gastrointestinal  
500 Panel to Detect Diarrheal Pathogens in Pediatric Patients. *Diagnostics (Basel)*. 2021;12(1). doi:  
501 10.3390/diagnostics12010034
- 502 50. Liu J, Platts-Mills JA, Juma J, Kabir F, Nkeze J, Okoi C, et al. Use of quantitative molecular  
503 diagnostic methods to identify causes of diarrhoea in children: a reanalysis of the GEMS case-control  
504 study. *Lancet*. 2016;388(10051):1291-301. doi: 10.1016/S0140-6736(16)31529-X
- 505 51. Gaensbauer JT, Lamb M, Calvimontes DM, Asturias EJ, Kamidani S, Contreras-Roldan IL, et al.  
506 Identification of Enteropathogens by Multiplex PCR among Rural and Urban Guatemalan Children with  
507 Acute Diarrhea. *Am J Trop Med Hyg*. 2019;101(3):534-40. doi: 10.4269/ajtmh.18-0962
- 508
- 509

## 510 **Supporting Information**

511 **S1 Table. Weight-for-height, height-for-age, and weight-for-age z-score for birth cohort infants at each home**  
512 **visit in Dili, Timor-Leste, 2019-2020.**

513 **S2 Table. Adjusted univariate odds ratios using a generalised estimating equations model for risk factors**  
514 **associated with pathogen detection for infants in a birth cohort, Dili, Timor-Leste, 2019-2020.**

515 **S3 Table. Adjusted univariate odds ratios using a generalised estimating equations model for risk factors**  
516 **associated with moderate wasting for infants in a birth cohort, Dili, Timor-Leste, 2019-2020.**

517 **S4 Table. Mean age in months at admission by diagnosis and type of enteric pathogen detected for hospital-**  
518 **based surveillance cases, Dili, Timor-Leste, 2019–2020.**

519 **S5 Table. Adjusted univariate odds ratios using a generalised estimating equations model for pathogens and**  
520 **host factors associated with hospitalisation for infants in a birth cohort, Dili, Timor-Leste, 2019-2020.**



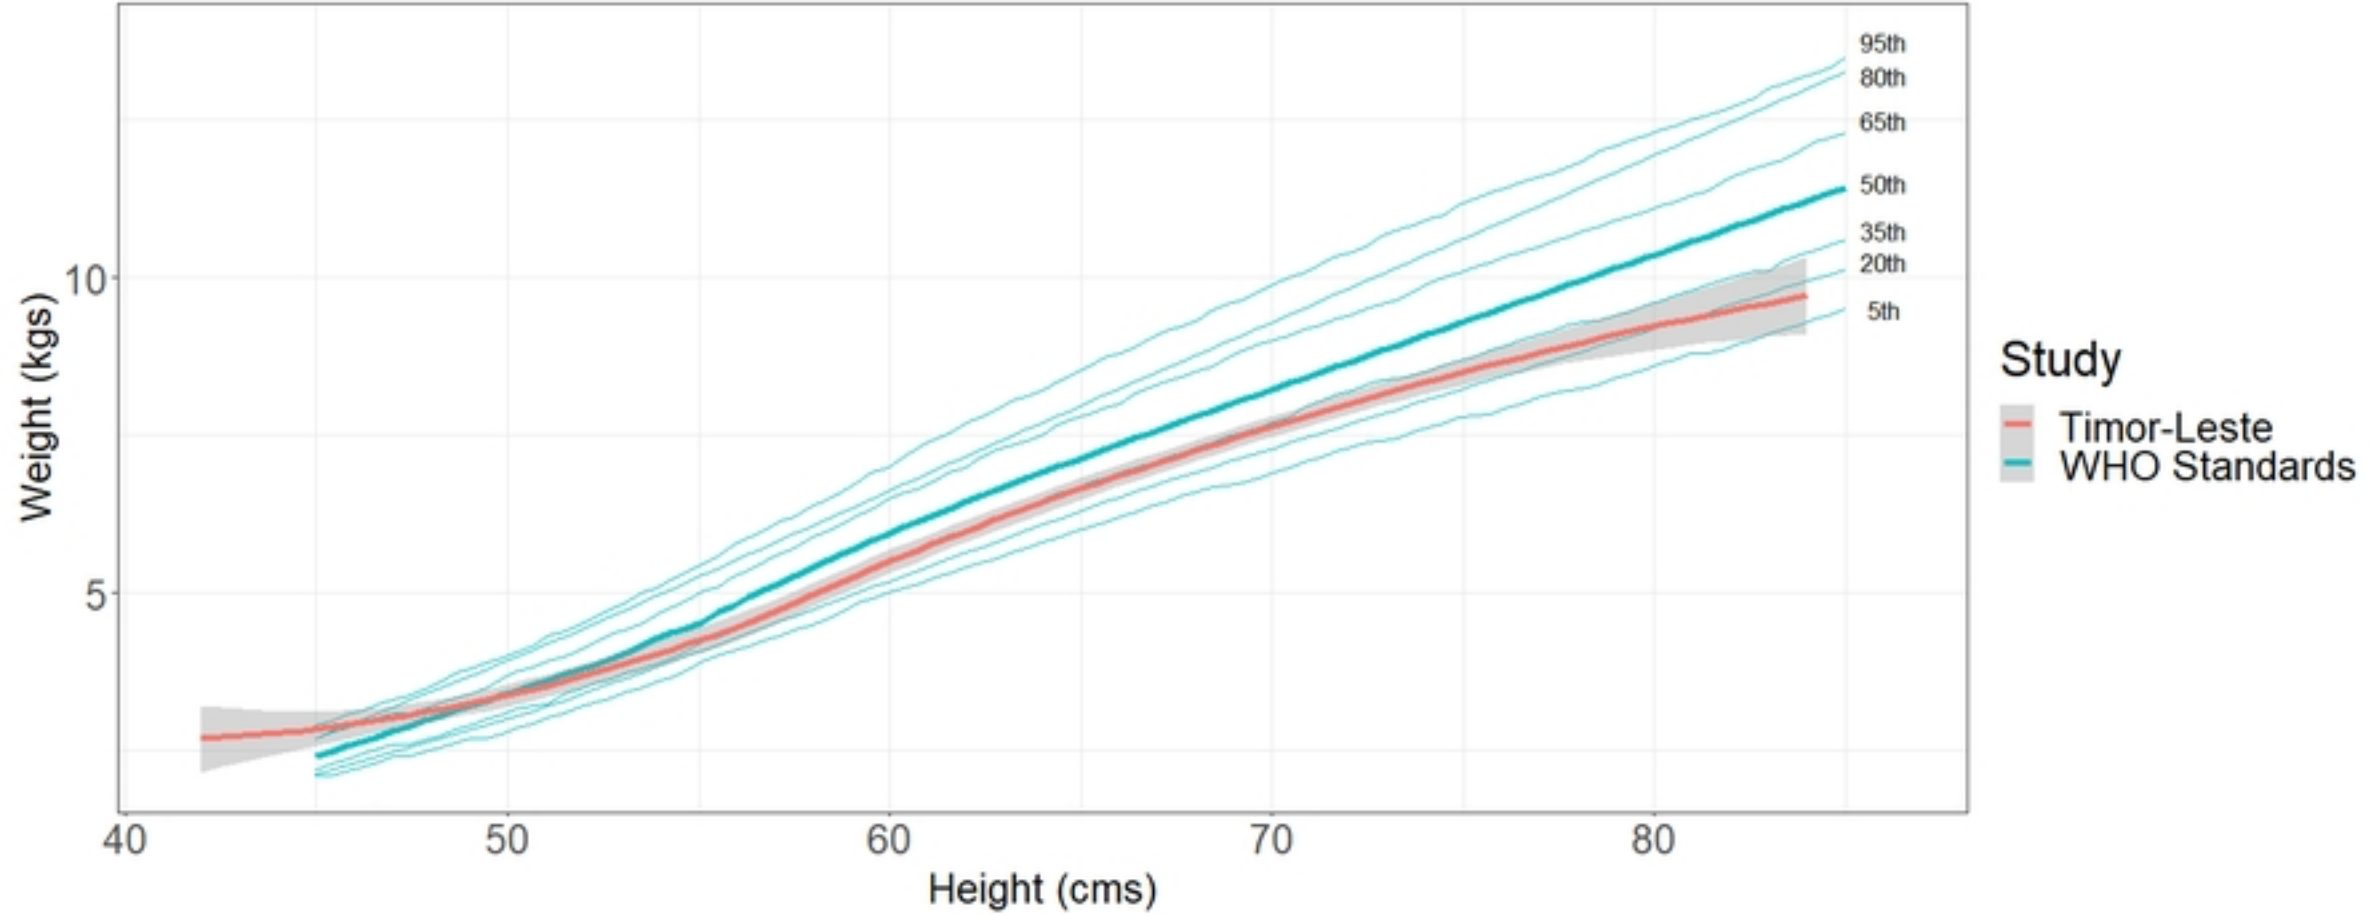

Fig1c

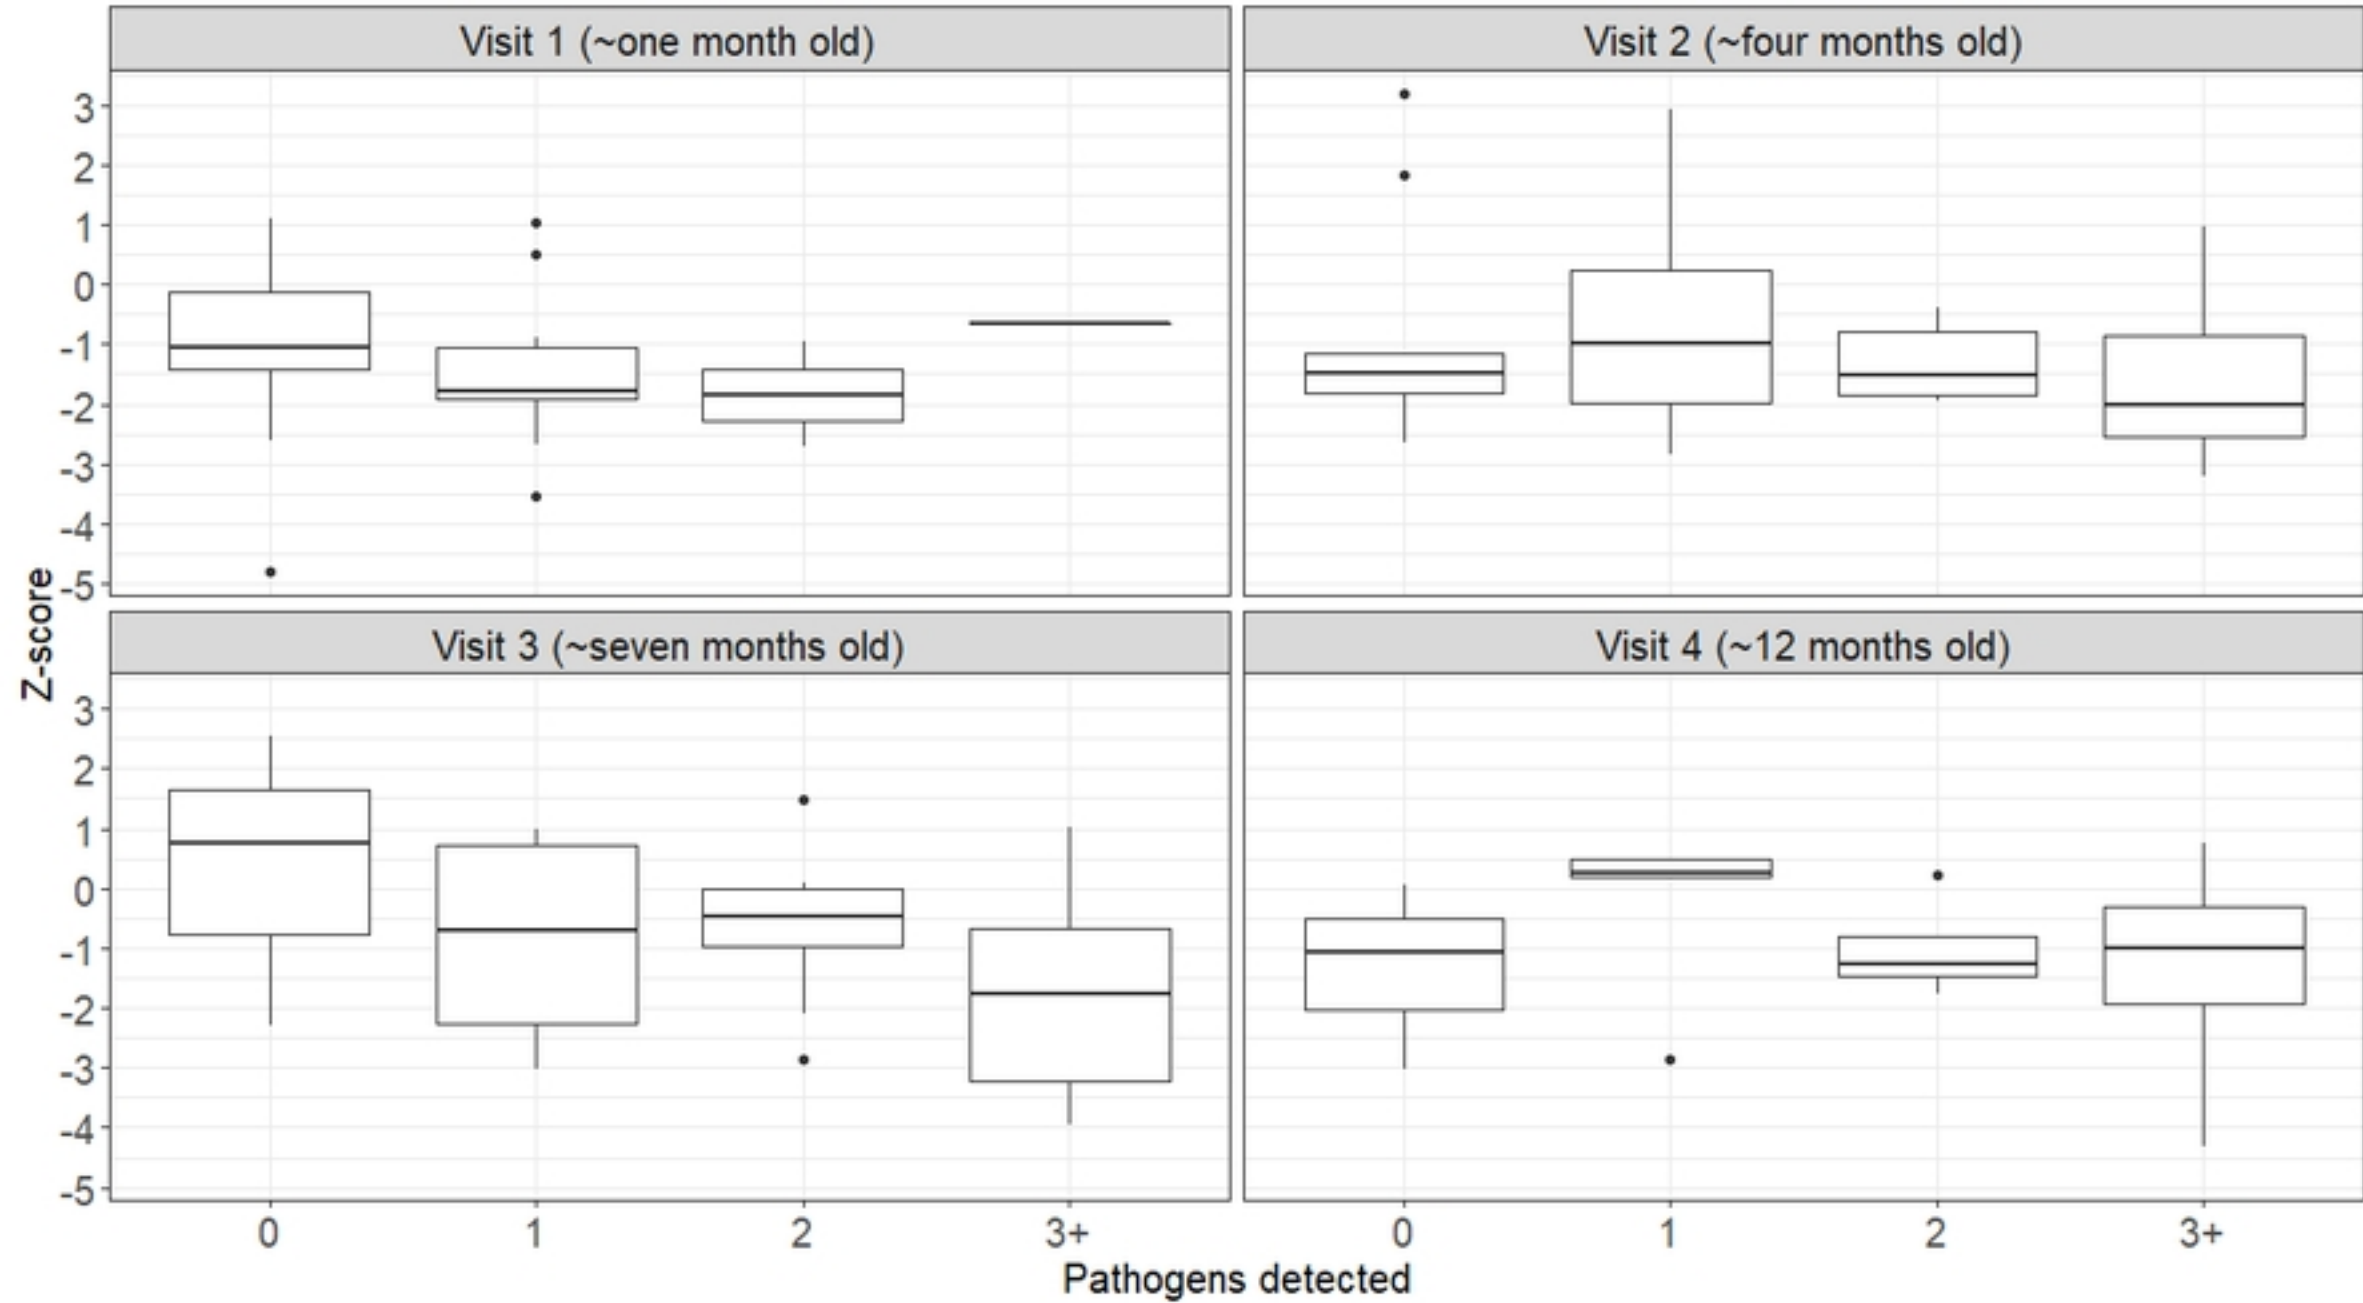

Fig2

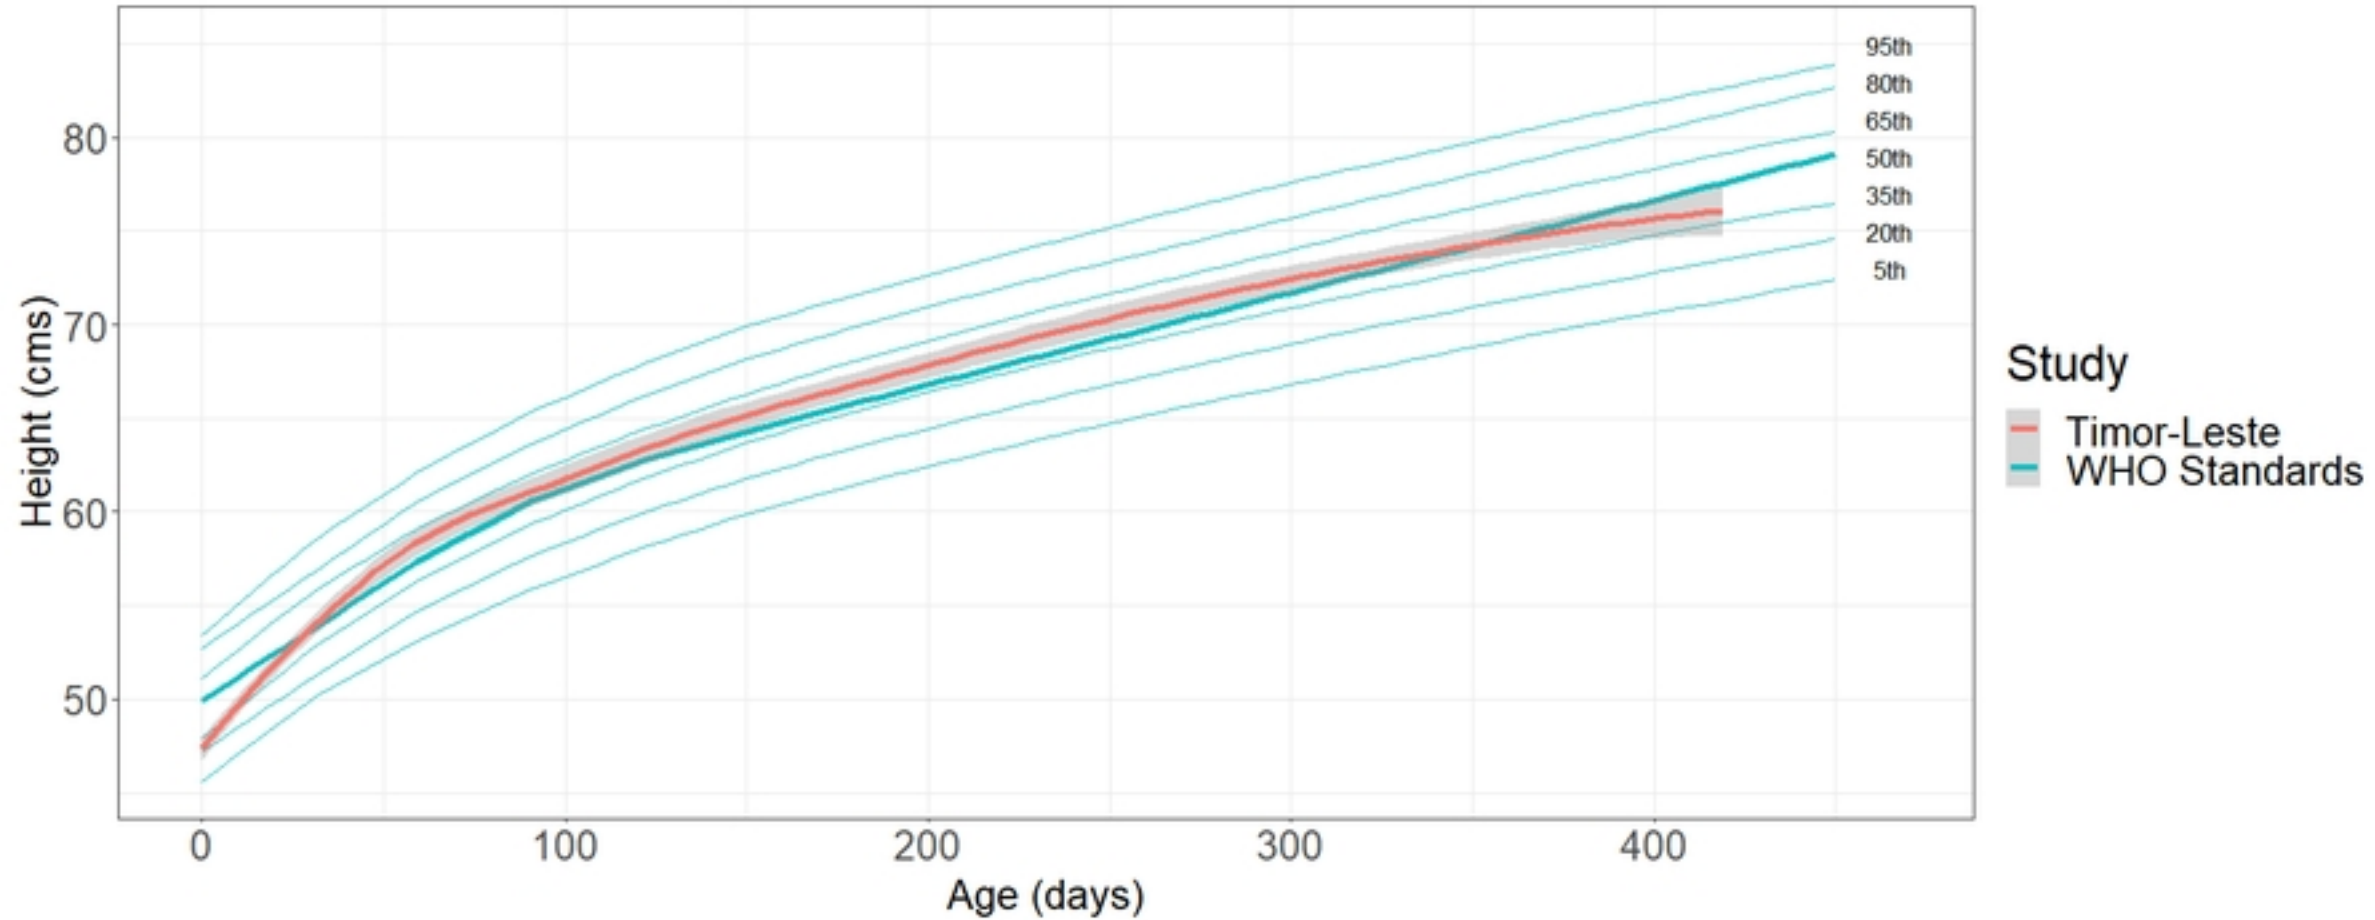

Fig1a

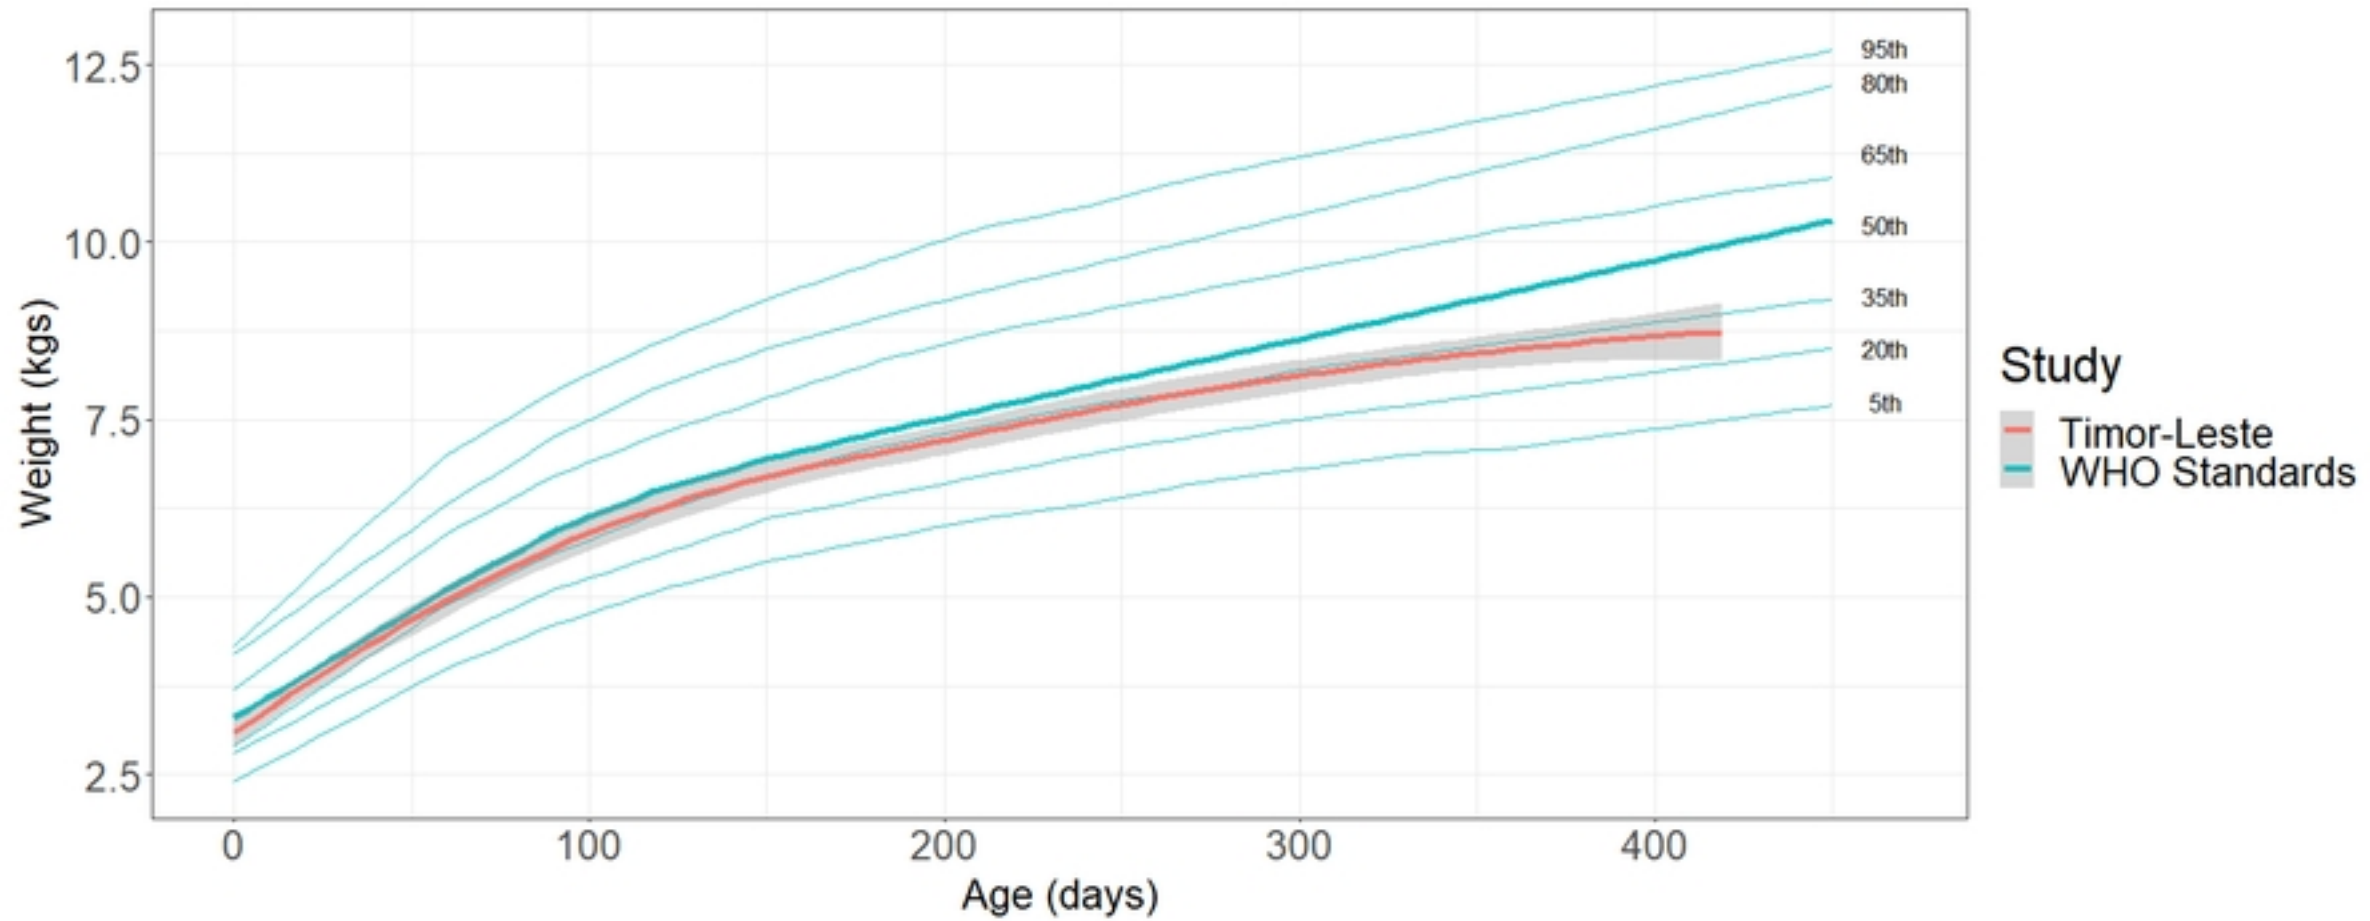

Fig1b
